# Supplementary material for: Maternal High Fat Diet-Induced Obesity Modifies Histone Binding and Expression of Oxtr in Offspring Hippocampus in a Sex-Specific Manner
Source: PubMed Central journal article supplement (PMC6359595; doi:10.3390/ijms20020329), 2019-01-15
Supplement: ijms-20-00329-s001.pdf [file ijms-20-00329-s001.pdf]

## Supplementary Materials

Table S1: Primer sequences used for qPCR analysis of gene expression.

| Gene Symbol   | Accession no.  | Forward Primer 5"-3"     | Reverse Primer 5"-3"      |
|---------------|----------------|--------------------------|---------------------------|
| <i>Avpr1a</i> | NM_016847.2    | TTCGTTTGGACCGATTCCGA     | CGTCCCAGTGCTGTTTGTG       |
| <i>Oxtr</i>   | NM_001081147.1 | TGGTTTGCATCCCTCCTGTC     | AGGTGTGCCGTCTTTCACAA      |
| <i>Gapdh</i>  | NM_001289726.1 | AACTTTGGCATTGTGGAAGG     | ACACATTGGGGGTAGGAACA      |
| <i>Pgk1</i>   | NM_008828.3    | CTCCGCTTTCATGTAGAGGAAG   | GACATCTCCTAGTTTGGACAGTG   |
| <i>Sdha</i>   | NM_023281.1    | GATTACTCCAAGCCCATCCA     | GCACAGTCAGCCTCATTCAA      |
| <i>Tbp</i>    | NM_013684.3    | GAAGAACAATCCAGACTAGCAGCA | CCTTATAGGGAACCTCACATCACAG |

Table S2: Primer sequences used for ChIP-qPCR analysis of histone binding to the *Oxtr* promoter.

Genomic Sequence; NC\_000072.6 Reference GRCm38.p4 C57BL/6J

| Target Region         | Forward Primer 5"-3" | Reverse Primer 5"-3"  |
|-----------------------|----------------------|-----------------------|
| <i>Oxtr</i> TSS -1063 | TGGATTCTCCGCCAGATTG  | GAGTTTGCAAAGACGCCGAG  |
| <i>Oxtr</i> TSS +14   | AGTATGAGACACAGGACCGC | CGCAGCCAACCTGGAGTATCG |
| <i>Oxtr</i> TSS +511  | CAGGGCTGGATGAAGACCG  | AGGTGCACATTTTCTCGCTG  |
